# Supplementary material
Source: PubMed Central journal article supplement (PMC3638058)

CT

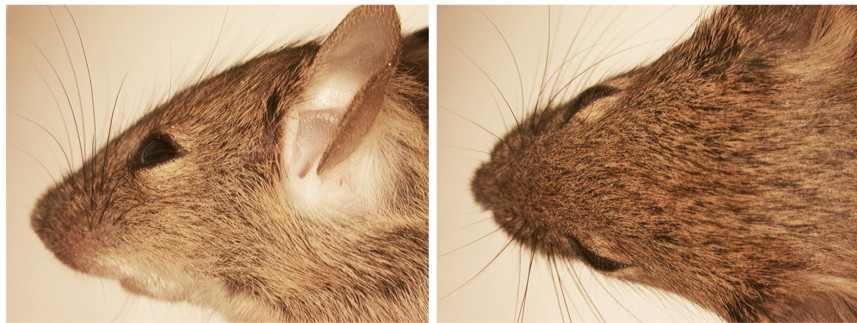

MT  
(Clone F1)

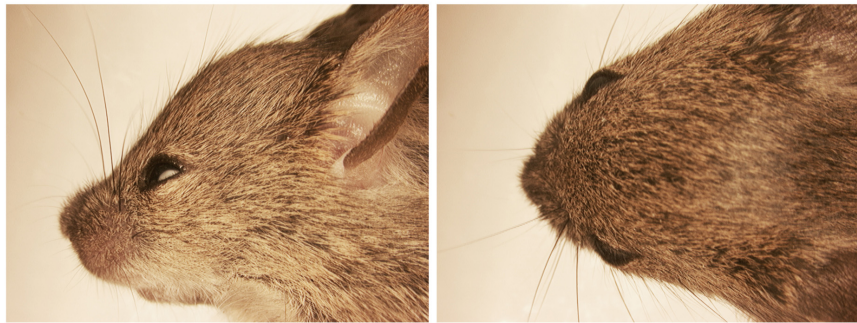

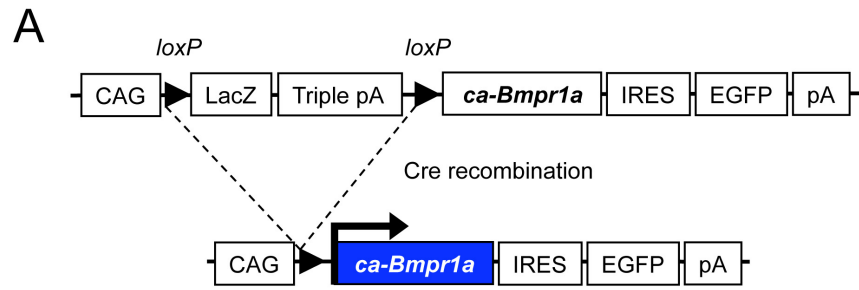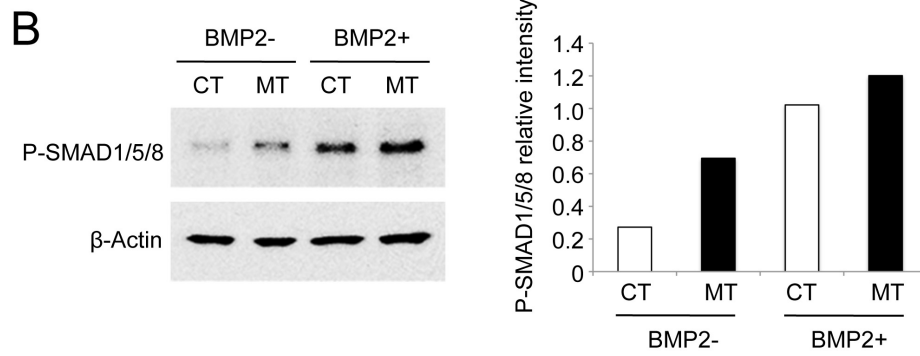

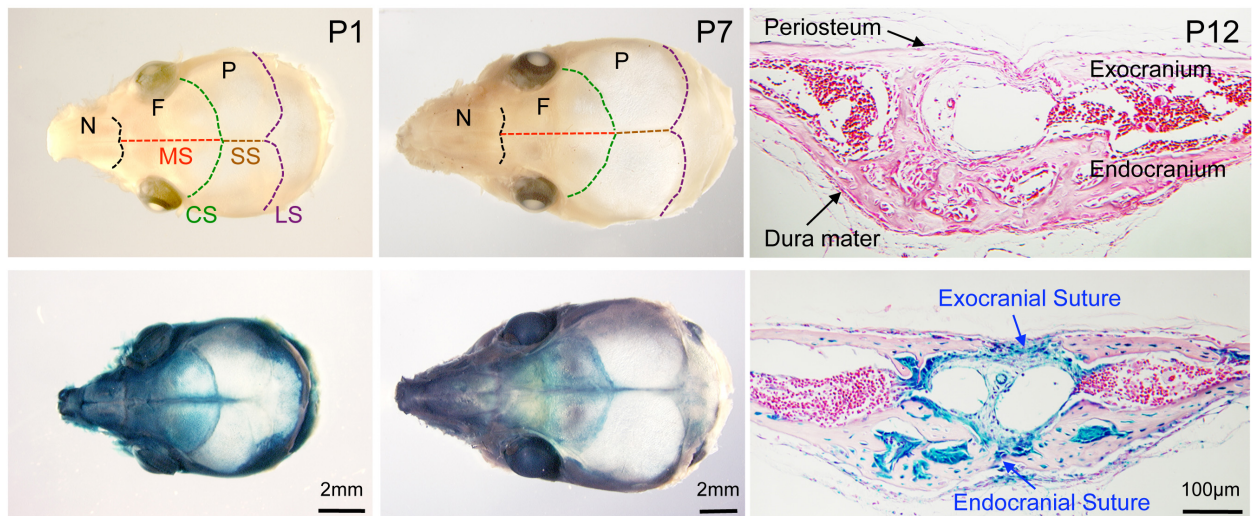

CT

MT

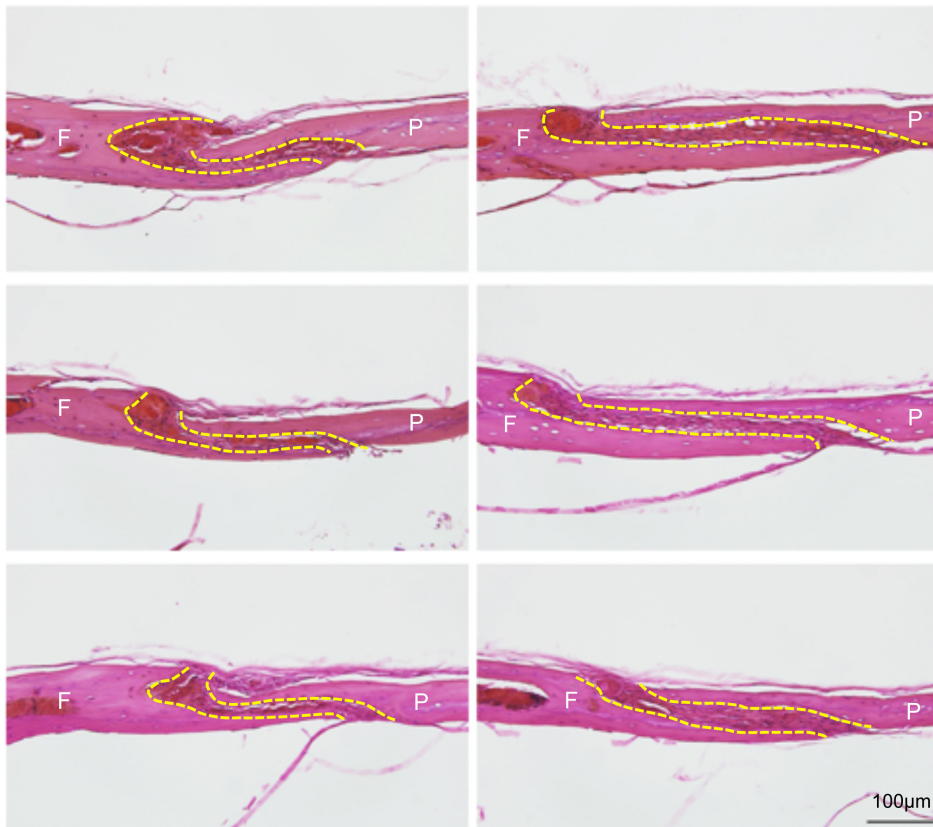

CT

MT

Komatsu et al., S5

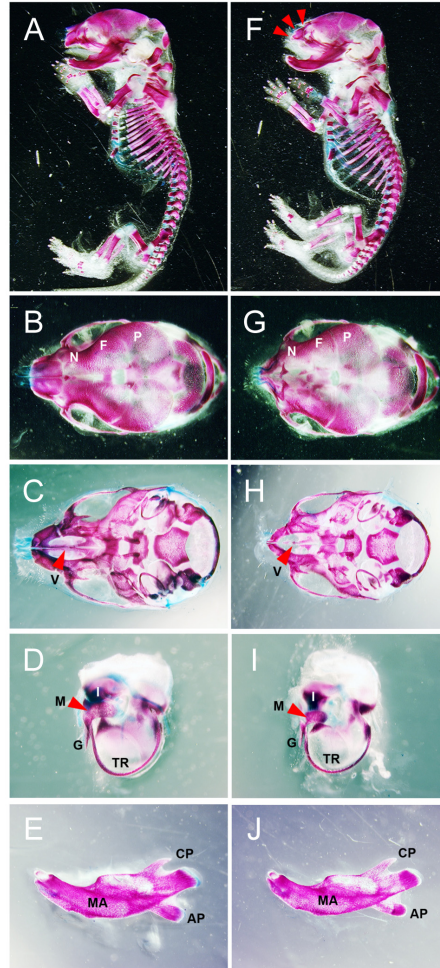

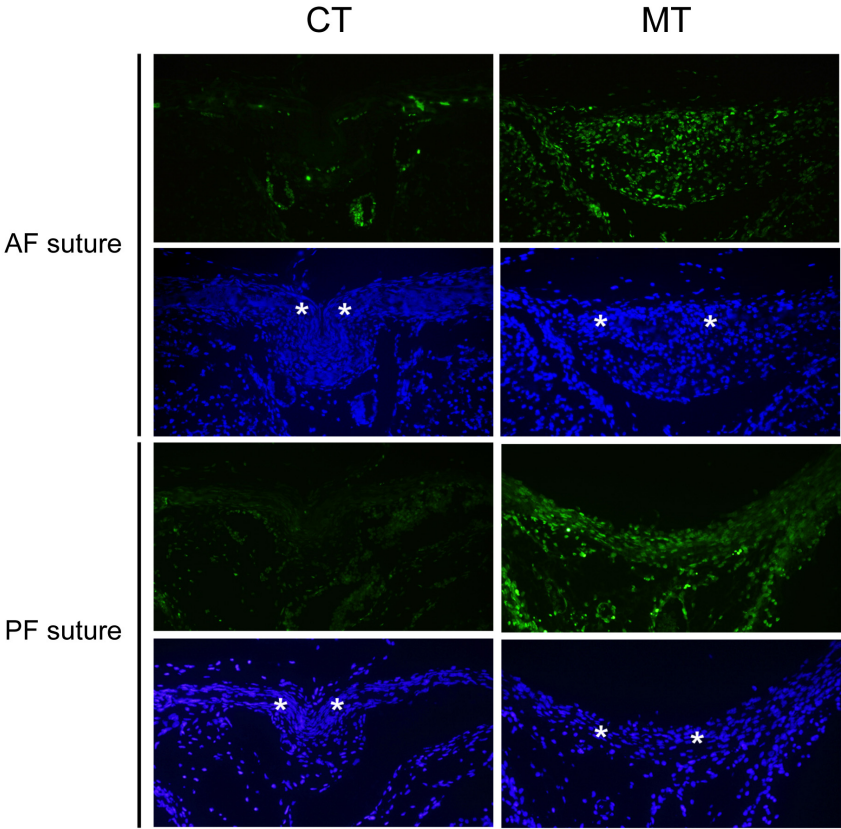

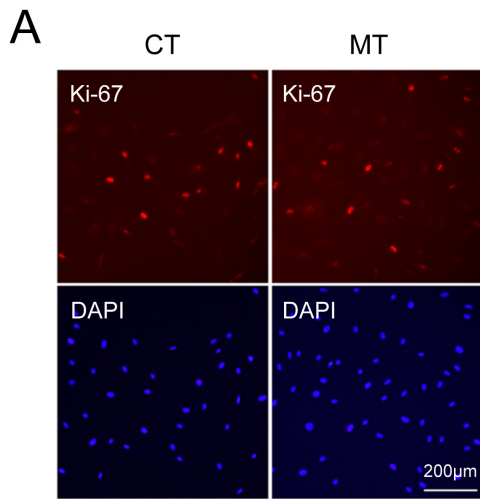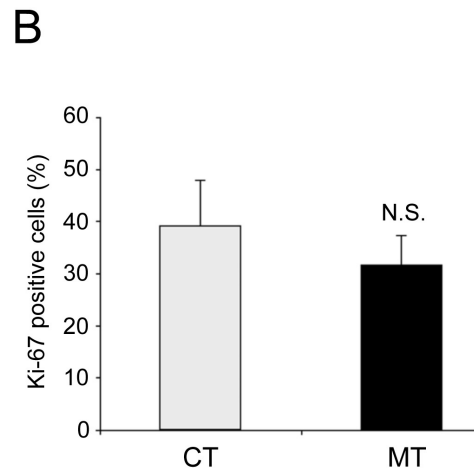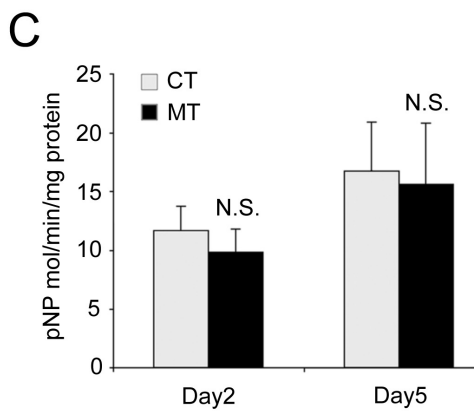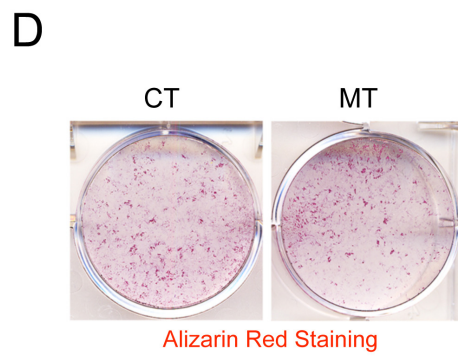

control

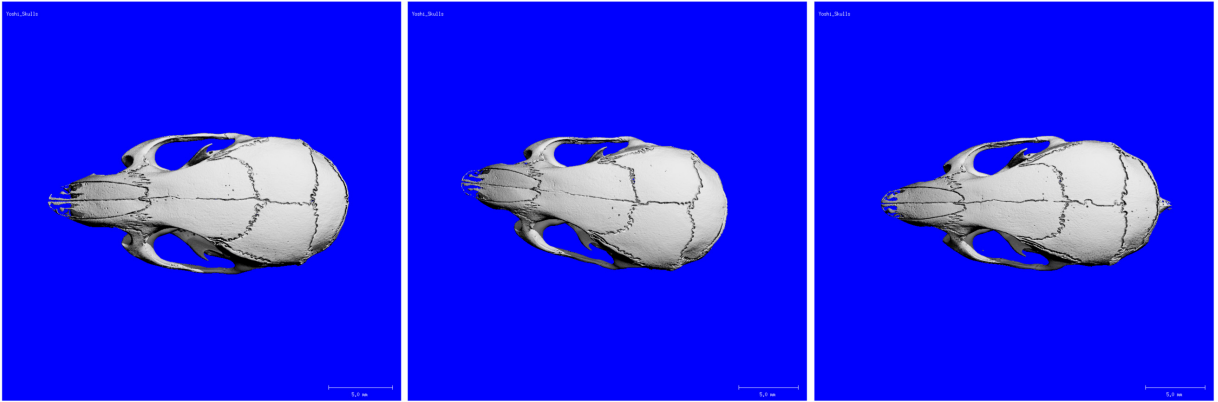

*ca-Bmpr1a:Col1-CreER*<sup>TM</sup>

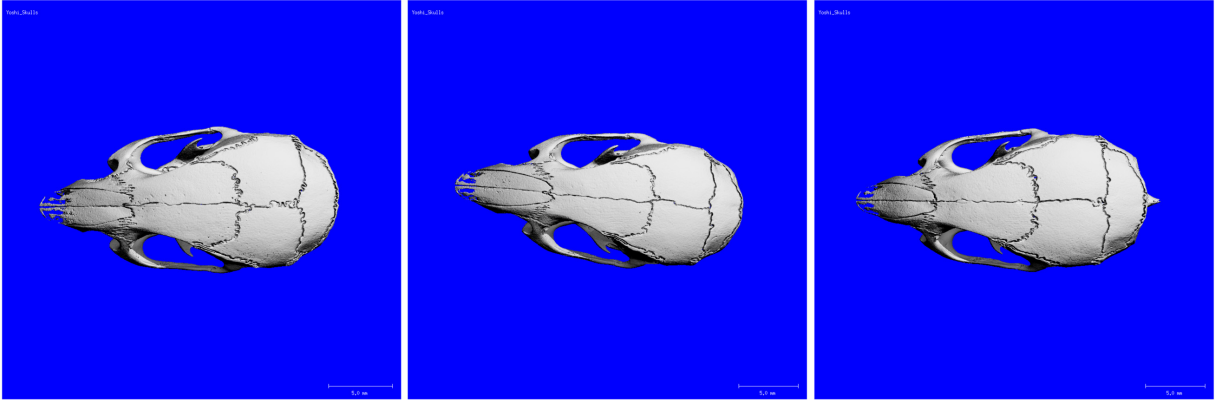

Supplement: NIHMS431095-supplement-Supp_Fig_S1-S9.pdf [file NIHMS431095-supplement-Supp_Fig_S1-S9.pdf]
